# Supplementary material for: Repeatability and reproducibility of longitudinal relaxation rate in 12 small-animal MRI systems
Source: PubMed Central journal article supplement (PMC6477178; doi:10.1016/j.mri.2019.03.008), 2019-06

## Supplementary Material

### S1. Author contributions

| Name                     | The author asserts s/he made substantial contributions to the conception or design of the work; or the acquisition, analysis, or interpretation of data for the work | The author asserts s/he contributed to drafting the work or revising it critically for important intellectual content | The author gives final approval of this version to be published | The author agrees to be accountable for all aspects of the work in ensuring that questions related to the accuracy or integrity of any part of the work are appropriately investigated and resolved |
|--------------------------|----------------------------------------------------------------------------------------------------------------------------------------------------------------------|-----------------------------------------------------------------------------------------------------------------------|-----------------------------------------------------------------|-----------------------------------------------------------------------------------------------------------------------------------------------------------------------------------------------------|
| Campbell, Simon          | Acquiring data                                                                                                                                                       | yes                                                                                                                   | yes                                                             | yes                                                                                                                                                                                                 |
| Gottschalk, Michael      | Acquiring data                                                                                                                                                       | yes                                                                                                                   | yes                                                             | yes                                                                                                                                                                                                 |
| Green, Claudia           | Acquiring data                                                                                                                                                       | yes                                                                                                                   | yes                                                             | yes                                                                                                                                                                                                 |
| Haase, Michael           | Acquiring data                                                                                                                                                       | yes                                                                                                                   | yes                                                             | yes                                                                                                                                                                                                 |
| Hines, Catherine DG      | Optimising protocol<br>Acquiring data                                                                                                                                | yes                                                                                                                   | yes                                                             | yes                                                                                                                                                                                                 |
| Hockings, Paul           | Optimising protocol<br>Acquiring data                                                                                                                                | yes                                                                                                                   | yes                                                             | yes                                                                                                                                                                                                 |
| Hoffmann, Katja          | Acquiring data                                                                                                                                                       | yes                                                                                                                   | yes                                                             | yes                                                                                                                                                                                                 |
| Juretschke, Hans-Paul    | Devising protocol                                                                                                                                                    | yes                                                                                                                   | yes                                                             | yes                                                                                                                                                                                                 |
| Köhler, Sascha           | Devising protocol                                                                                                                                                    | yes                                                                                                                   | yes                                                             | yes                                                                                                                                                                                                 |
| Laitinen, Iina           | Optimising protocol<br>Acquiring data                                                                                                                                | yes                                                                                                                   | yes                                                             | yes                                                                                                                                                                                                 |
| Lloyd, William           | Acquiring data                                                                                                                                                       | yes                                                                                                                   | yes                                                             | yes                                                                                                                                                                                                 |
| Luo, Yanping             | Acquiring data                                                                                                                                                       | yes                                                                                                                   | yes                                                             | yes                                                                                                                                                                                                 |
| Mahmutovic Persson, Irma | Acquiring data                                                                                                                                                       | yes                                                                                                                   | yes                                                             | yes                                                                                                                                                                                                 |
| O'Connor, James PB       | Interpreting data                                                                                                                                                    | yes                                                                                                                   | yes                                                             | yes                                                                                                                                                                                                 |
| Olsson, Lars E           | Devising phantom                                                                                                                                                     | yes                                                                                                                   | yes                                                             | yes                                                                                                                                                                                                 |
| Pindoria, Kashmira       | Acquiring data                                                                                                                                                       | yes                                                                                                                   | yes                                                             | yes                                                                                                                                                                                                 |
| Schneider, Jurgen E.     | Acquiring data                                                                                                                                                       | yes                                                                                                                   | yes                                                             | yes                                                                                                                                                                                                 |
| Schütz, Gunnar           | Devising project<br>Devising phantom<br>Acquiring data                                                                                                               | yes                                                                                                                   | yes                                                             | yes                                                                                                                                                                                                 |
| Sourbron, Steven         | Simulations                                                                                                                                                          | yes                                                                                                                   | yes                                                             | yes                                                                                                                                                                                                 |
| Steinmann, Denise        | Acquiring data                                                                                                                                                       | yes                                                                                                                   | yes                                                             | yes                                                                                                                                                                                                 |
| Strobel, Klaus           | Acquiring data                                                                                                                                                       | yes                                                                                                                   | yes                                                             | yes                                                                                                                                                                                                 |
| Tadimalla, Sirisha       | Simulations                                                                                                                                                          | yes                                                                                                                   | yes                                                             | yes                                                                                                                                                                                                 |
| Teh, Irvin               | Acquiring data                                                                                                                                                       | yes                                                                                                                   | yes                                                             | yes                                                                                                                                                                                                 |
| Veltien, Andor           | Acquiring data                                                                                                                                                       | yes                                                                                                                   | yes                                                             | yes                                                                                                                                                                                                 |
| Waterton, John C         | Devising project<br>Devising protocol<br>Acquiring data<br>Analysing data<br>Interpreting data                                                                       | yes                                                                                                                   | yes                                                             | yes                                                                                                                                                                                                 |
| Ziemian, Sabina          | Devising phantom<br>Acquiring data                                                                                                                                   | yes                                                                                                                   | yes                                                             | yes                                                                                                                                                                                                 |
| Zhang, Xiaomeng          | Acquiring data                                                                                                                                                       | yes                                                                                                                   | yes                                                             | yes                                                                                                                                                                                                 |

## S2.1. Raw data

The columns represent: centre; B<sub>0</sub>; Phantom [Ni<sup>2+</sup>]; whether first or second day; R<sub>1</sub> for RoI at isocentre; R<sub>1</sub> for RoI displaced in X; R<sub>1</sub> for RoI displaced in Z; SD for R<sub>1</sub> for RoI at isocentre; SD for R<sub>1</sub> for RoI displaced in X; SD for R<sub>1</sub> for RoI displaced in Z; temperature °C.

```
centre,B0,mM,day,O,X,Z,eO,eX,eZ,T
A,7.0,0.50,1,0.820,0.840,0.893,0.028,0.039,0.067,20.78
A,7.0,0.50,2,0.781,0.787,0.794,0.006,0.008,0.009,20.70
A,7.0,1.04,1,1.267,1.274,1.258,0.015,0.017,0.024,19.70
A,7.0,1.04,2,1.302,1.297,1.332,0.012,0.013,0.015,20.80
A,7.0,2.02,1,2.079,2.110,2.066,0.046,0.037,0.077,21.03
A,7.0,2.02,2,2.101,2.128,2.141,0.024,0.043,0.036,20.70
A,7.0,4.08,1,3.984,3.817,3.861,0.129,0.152,0.136,21.05
A,7.0,4.08,2,3.831,3.774,3.891,0.033,0.038,0.050,20.74
A,7.0,8.05,1,6.667,7.143,7.194,0.782,0.653,0.274,20.50
A,7.0,8.05,2,7.143,7.143,7.194,0.104,0.175,0.093,20.80
B,3.0,0.50,1,0.725,0.730,0.730,0.013,0.014,0.014,20.05
B,3.0,0.50,2,0.794,0.794,0.813,0.013,0.014,0.014,15.00
B,3.0,1.04,1,1.068,1.086,1.100,0.012,0.011,0.012,19.55
B,3.0,1.04,2,1.120,1.115,1.149,0.004,0.008,0.005,16.75
B,3.0,2.02,1,1.764,1.761,1.812,0.005,0.005,0.005,19.80
B,3.0,2.02,2,1.776,1.754,1.805,0.004,0.006,0.004,17.75
B,3.0,4.08,1,3.115,3.115,3.165,0.002,0.002,0.002,19.00
B,3.0,4.08,2,3.125,3.115,3.154,0.004,0.001,0.002,18.15
B,3.0,8.05,1,5.747,5.747,5.780,0.001,0.001,0.001,18.60
B,3.0,8.05,2,5.814,5.747,5.814,0.002,0.001,0.002,18.35
C,7.0,0.50,1,0.788,0.807,0.806,0.006,0.005,0.011,20.80
C,7.0,0.50,2,0.803,0.816,0.824,0.006,0.008,0.007,21.45
C,7.0,1.04,1,1.266,1.292,1.288,0.010,0.010,0.011,20.60
C,7.0,1.04,2,1.255,1.255,1.266,0.008,0.011,0.008,21.55
C,7.0,2.02,1,2.127,2.131,2.160,0.014,0.010,0.012,21.00
C,7.0,2.02,2,2.131,2.104,2.175,0.019,0.017,0.022,21.60
C,7.0,4.08,1,3.838,3.936,3.841,0.030,0.012,0.028,21.40
C,7.0,4.08,2,3.827,3.882,3.844,0.021,0.025,0.011,21.40
C,7.0,8.05,1,7.196,7.227,7.144,0.046,0.040,0.045,21.70
C,7.0,8.05,2,7.248,7.357,7.193,0.043,0.070,0.040,21.25
D,4.7,0.50,1,0.794,0.800,0.813,0.017,0.020,0.019,18.25
D,4.7,0.50,2,0.775,0.794,0.794,0.016,0.024,0.019,19.35
D,4.7,1.04,1,1.174,1.185,1.206,0.029,0.024,0.028,18.90
D,4.7,1.04,2,1.181,1.189,1.206,0.028,0.031,0.031,19.70
D,4.7,2.02,1,1.953,1.953,2.000,0.044,0.045,0.041,19.40
D,4.7,2.02,2,1.931,1.942,1.976,0.044,0.043,0.041,19.65
D,4.7,4.08,1,3.472,3.472,3.521,0.075,0.084,0.077,19.45
D,4.7,4.08,2,3.484,3.484,3.546,0.075,0.098,0.079,19.85
D,4.7,8.05,1,6.410,6.410,6.494,0.177,0.196,0.175,19.35
D,4.7,8.05,2,6.494,6.494,6.536,0.191,0.152,0.175,19.65
E,7.0,0.50,1,0.800,0.826,0.826,0.013,0.021,0.016,17.80
E,7.0,0.50,2,0.794,0.813,0.813,0.015,0.015,0.020,18.50
E,7.0,1.04,1,1.255,1.276,1.287,0.028,0.052,0.034,18.35
E,7.0,1.04,2,1.261,1.290,1.300,0.021,0.038,0.029,19.85
E,7.0,2.02,1,2.096,2.183,2.183,0.042,0.038,0.053,18.35
E,7.0,2.02,2,2.083,2.160,2.146,0.032,0.041,0.044,20.55
E,7.0,4.08,1,3.802,3.984,3.891,0.070,0.083,0.073,18.65
E,7.0,4.08,2,3.788,3.906,3.876,0.065,0.085,0.074,20.30
E,7.0,8.05,1,7.143,7.519,7.353,0.155,0.205,0.234,19.25
E,7.0,8.05,2,6.993,7.463,7.299,0.185,0.217,0.214,19.75
F,7.0,0.50,1,0.810,0.820,0.813,0.008,0.007,0.009,20.50
F,7.0,0.50,2,0.806,0.817,0.820,0.006,0.005,0.009,19.20
F,7.0,1.04,1,1.272,1.294,1.285,0.011,0.012,0.015,18.85
F,7.0,1.04,2,1.245,1.267,1.284,0.017,0.014,0.018,19.50
F,7.0,2.02,1,2.119,2.146,2.155,0.009,0.009,0.014,19.45
F,7.0,2.02,2,2.151,2.165,2.155,0.018,0.019,0.019,19.00
F,7.0,4.08,1,3.891,3.953,3.937,0.030,0.031,0.062,18.95
F,7.0,4.08,2,3.906,3.937,3.937,0.046,0.078,0.031,18.85
F,7.0,8.05,1,7.299,7.299,7.353,0.053,0.053,0.054,19.10
```

F,7.0,8.05,2,7.407,7.407,7.353,0.165,0.055,0.108,18.65  
G1,7.0,0.50,1,0.817,0.812,0.796,0.007,0.006,0.005,18.25  
G1,7.0,0.50,2,0.820,0.833,0.817,0.002,0.002,0.002,18.20  
G1,7.0,1.04,1,1.260,1.290,1.284,0.015,0.009,0.010,18.35  
G1,7.0,1.04,2,1.250,1.269,1.231,0.006,0.005,0.008,18.40  
G1,7.0,2.02,1,2.114,2.164,2.117,0.048,0.054,0.053,18.40  
G1,7.0,2.02,2,2.112,2.182,2.096,0.053,0.053,0.051,18.40  
G1,7.0,4.08,1,3.909,3.956,3.881,0.097,0.109,0.099,18.50  
G1,7.0,4.08,2,3.905,3.904,3.902,0.100,0.114,0.101,18.35  
G1,7.0,8.05,1,7.193,7.456,7.345,0.234,0.249,0.261,18.45  
G1,7.0,8.05,2,7.197,7.196,7.144,0.227,0.209,0.216,18.15  
G2,4.7,0.50,1,0.748,0.756,0.767,0.037,0.039,0.037,18.45  
G2,4.7,0.50,2,0.769,0.773,0.782,0.035,0.037,0.035,18.15  
G2,4.7,1.04,1,1.143,1.158,1.171,0.048,0.049,0.053,18.25  
G2,4.7,1.04,2,1.132,1.152,1.170,0.040,0.051,0.049,18.30  
G2,4.7,2.02,1,1.883,1.883,1.943,0.098,0.088,0.083,18.15  
G2,4.7,2.02,2,1.873,1.884,1.936,0.073,0.076,0.084,18.15  
G2,4.7,4.08,1,3.358,3.479,3.476,0.150,0.165,0.159,18.20  
G2,4.7,4.08,2,3.439,3.464,3.490,0.153,0.159,0.149,18.20  
G2,4.7,8.05,1,6.370,6.336,6.428,0.319,0.343,0.346,18.10  
G2,4.7,8.05,2,6.437,6.412,6.484,0.335,0.356,0.341,18.35  
H,4.7,0.50,1,0.761,0.769,0.757,0.007,0.007,0.008,20.75  
H,4.7,0.50,2,0.749,0.748,0.733,0.005,0.005,0.008,21.55  
H,4.7,1.04,1,1.155,1.144,1.163,0.010,0.010,0.013,21.25  
H,4.7,1.04,2,1.160,1.126,1.148,0.016,0.013,0.016,21.30  
H,4.7,2.02,1,1.942,1.912,1.936,0.008,0.008,0.013,21.05  
H,4.7,2.02,2,1.922,1.910,1.954,0.017,0.017,0.017,20.95  
H,4.7,4.08,1,3.461,3.453,3.461,0.027,0.027,0.055,20.90  
H,4.7,4.08,2,3.517,3.411,3.514,0.041,0.067,0.028,20.90  
H,4.7,8.05,1,6.464,6.443,6.592,0.047,0.047,0.048,20.85  
H,4.7,8.05,2,6.566,6.373,6.553,0.146,0.047,0.096,20.90  
J,4.7,0.50,1,0.789,0.842,0.795,0.010,0.014,0.011,NaN  
J,4.7,0.50,2,0.798,0.798,0.808,0.006,0.007,0.008,NaN  
J,4.7,1.04,1,1.183,1.276,1.187,0.007,0.024,0.009,NaN  
J,4.7,1.04,2,1.187,1.196,1.213,0.010,0.008,0.013,NaN  
J,4.7,2.02,1,1.956,1.966,1.985,0.014,0.057,0.040,NaN  
J,4.7,2.02,2,1.934,1.941,1.954,0.011,0.016,0.015,NaN  
J,4.7,4.08,1,3.419,3.572,3.402,0.013,0.043,0.038,NaN  
J,4.7,4.08,2,3.512,3.454,3.564,0.017,0.024,0.022,NaN  
J,4.7,8.05,1,6.237,6.665,6.187,0.066,0.070,0.084,NaN  
J,4.7,8.05,2,6.433,6.370,6.478,0.073,0.038,0.046,NaN  
K,9.4,0.50,1,0.862,0.877,0.862,0.017,0.015,0.018,18.05  
K,9.4,0.50,2,0.885,0.847,0.862,0.014,0.013,0.013,18.85  
K,9.4,1.04,1,1.401,1.381,1.397,0.024,0.025,0.021,18.40  
K,9.4,1.04,2,1.387,1.379,1.366,0.023,0.021,0.022,18.50  
K,9.4,2.02,1,2.336,2.326,2.342,0.033,0.065,0.038,18.05  
K,9.4,2.02,2,2.336,2.304,2.331,0.038,0.036,0.037,18.80  
K,9.4,4.08,1,4.202,4.237,4.167,0.071,0.108,0.069,18.05  
K,9.4,4.08,2,4.202,4.149,4.202,0.064,0.074,0.076,18.85  
K,9.4,8.05,1,7.874,7.634,7.813,0.124,0.175,0.183,18.05  
K,9.4,8.05,2,7.874,7.752,7.813,0.155,0.162,0.177,18.85  
L,11.7,0.50,1,0.870,0.885,0.885,0.011,0.013,0.024,18.15  
L,11.7,0.50,2,0.916,0.910,0.919,0.011,0.012,0.018,18.15  
L,11.7,1.04,1,1.266,1.284,1.252,0.034,0.031,0.019,18.60  
L,11.7,1.04,2,1.462,1.490,1.479,0.024,0.023,0.030,18.45  
L,11.7,2.02,1,2.353,2.358,2.347,0.300,0.322,0.326,18.65  
L,11.7,2.02,2,2.564,2.513,2.475,0.048,0.053,0.053,18.05  
L,11.7,4.08,1,4.274,4.274,4.329,0.069,0.071,0.071,17.30  
L,11.7,4.08,2,4.348,4.292,4.367,0.079,0.074,0.071,18.20  
L,11.7,8.05,1,7.937,8.000,8.065,0.157,0.147,0.150,18.65  
L,11.7,8.05,2,7.937,8.000,8.065,0.151,0.147,0.150,17.75

## S2.2. Raw data DNE

The columns represent the mean  $\div$  SD of the 38 measurements from RoI {0,0,0} made dynamically over 5 minutes in each of the centres

| day | mM  | A   | B   | C   | D   | E   | F   | G1  | G2  | H   | J   | K   | L  |
|-----|-----|-----|-----|-----|-----|-----|-----|-----|-----|-----|-----|-----|----|
| 1   | 0.5 | 231 | 143 | 328 | 231 | 183 | 234 | 363 | 139 | 73  | NaN | 269 | 40 |
| 1   | 1   | 461 | 190 | 295 | 231 | 253 | 372 | 417 | 199 | 89  | NaN | 207 | 60 |
| 1   | 2   | 484 | 291 | 306 | 277 | 212 | 350 | 166 | 220 | 104 | NaN | 313 | 51 |
| 1   | 4   | 227 | 299 | 424 | 319 | 194 | 415 | 175 | 237 | 95  | NaN | 182 | 53 |
| 1   | 8   | 152 | 300 | 357 | 307 | 224 | 309 | 187 | 281 | 98  | NaN | 231 | 49 |
| 2   | 0.5 | 112 | 230 | 242 | 170 | 157 | 259 | 281 | 154 | 66  | NaN | 282 | 32 |
| 2   | 1   | 92  | 185 | 322 | 221 | 234 | 281 | 207 | 123 | 109 | NaN | 319 | 41 |
| 2   | 2   | 435 | 206 | 391 | 287 | 238 | 348 | 284 | 183 | 125 | NaN | 303 | 66 |
| 2   | 4   | 603 | 209 | 335 | 300 | 114 | 403 | 273 | 222 | 127 | NaN | 530 | 42 |
| 2   | 8   | 127 | 204 | 415 | 286 | 204 | 359 | 401 | 215 | 122 | NaN | 244 | 72 |

## S3. Phantoms

### Preparation and validation of the phantom material

Materials: nickel chloride hexahydrate (purity 99.99%), agarose molecular biology reagent, sodium azide (purity 99.5%), paraffin wax (mp 53-57 °C, ASTM D 87) were all purchased from Sigma-Aldrich (Sigma-Aldrich Chemie GmbH, Steinheim). Water was purified by a Milli-Q Gradient machine (Merck KGaA, Darmstadt, Germany) equipped with a 0.16 µm filter.

Phantoms with five nickel chloride concentrations of 0.5, 1, 2, 4 and 8 mM, 2 wt% agarose and 0.05 wt% sodium azide were prepared in glass vials with dimensions of 30 x 55 mm. The diameter of the vial was chosen so that the vial can be readily imaged in a standard pre-clinical MRI scanner.

Each phantom nickel concentration preparation was executed separately in a total volume of 0.5 L. 10 g of agarose and 0.25 g of sodium azide were added to nickel chloride hexahydrate (0.0594, 0.1188, 0.2377, 0.4753 and 0.9506 g for the preparation of 0.5, 1, 2, 4 and 8 mM, respectively) dissolved in 400 mL of MilliQ water in a 0.5 L glass round bottom flask. The mixture was subjected to a microwave at 600 W up to 7 min to dissolve agarose but not allowing for a vigorous boiling. Once dissolved, the mixture was transferred to a 0.5 L Erlenmeyer flask with ground glass stopper. The total volume of phantom material was adjusted to 0.5 L by an addition of Millipore water (at approx. 80 °C). Then the mixture was shaken and placed in an ultrasonic bath set at 80 °C for 10 min. The final solution was poured into 20 vials to the height of 4 cm. The vials were closed with black gummi lids and positioned in a tray in the ultrasonic bath for 3 min at 80 °C. The phantom material was left to solidify. After 2 h, a melted paraffin wax was poured on top of an agarose gel forming a thin layer. The vials were covered with the gummi lids on top of a hot paraffin layer.

| Phantom No | Theor Ni Conc (mM) | Vol (l) | Ni mass (g) | 2 wt% Agarose (g) | 0,05 wt% sodium azide (g) |
|------------|--------------------|---------|-------------|-------------------|---------------------------|
| 1          | 0,50               | 0,5     | 0,0594      | 10                | 0,25                      |
| 2          | 1,00               | 0,5     | 0,1188      | 10                | 0,25                      |
| 3          | 2,00               | 0,5     | 0,2377      | 10                | 0,25                      |
| 4          | 4,00               | 0,5     | 0,4753      | 10                | 0,25                      |
| 5          | 8,00               | 0,5     | 0,9506      | 10                | 0,25                      |

Nickel concentration was analysed by ICP-OES . One vial for each set of phantoms was randomly picked up and nickel concentration was measured at 3 different heights for each vial.

Calibration standards: 5 ppm Ni + 2 ppm Y in 5% HNO<sub>3</sub>.

All samples were treated as tissue samples. 100 mg gel + Y (internal standard, sufficient amount for the final volume to be 2 ppm) and 65% HNO<sub>3</sub> + 30% H<sub>2</sub>O<sub>2</sub> were added according to large vessel degradation procedure KM A 10. Final volume was diluted so that ~ 2-10 ppm Ni in ~ 5% HNO<sub>3</sub> was obtained.

| Phantom No | Measured Ni Conc. (mM) by ICP-OES |
|------------|-----------------------------------|
| 1          | 0,50 ± 0,01                       |
| 2          | 1,04 ± 0,03                       |
| 3          | 2,02 ± 0,03                       |
| 4          | 4,08 ± 0,04                       |
| 5          | 8,05 ± 0,12                       |

## Supplementary Figure 3.1

$R_1$  phantoms

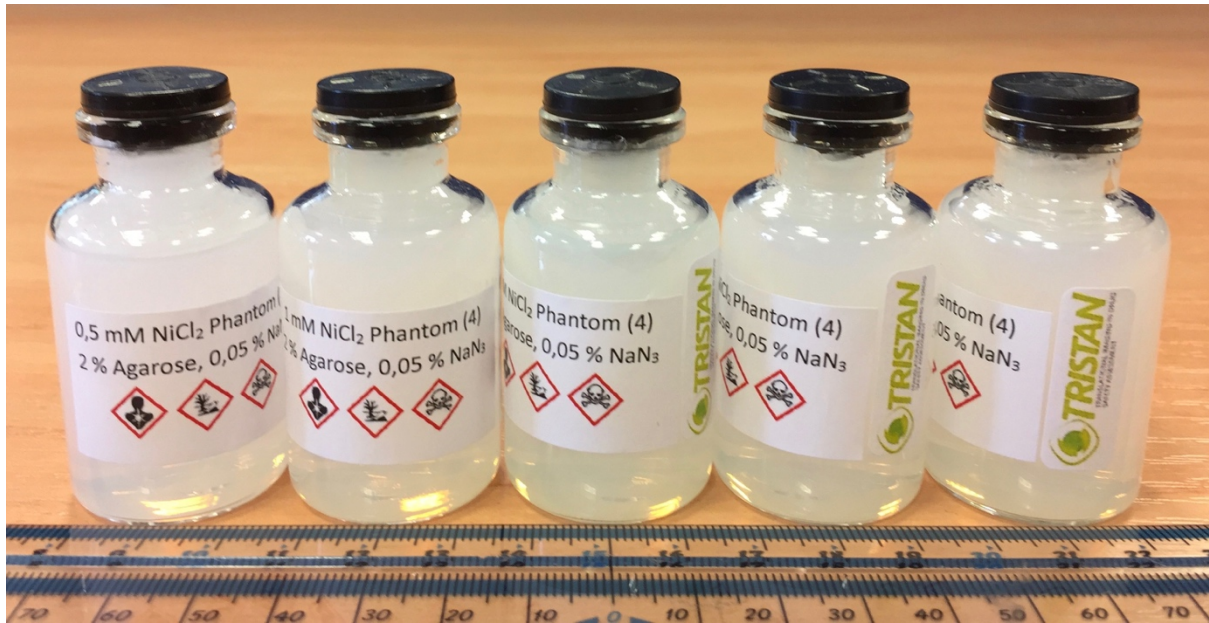

## Supplementary Figure 3.2

$R_1$  phantom *in situ* in cucumber

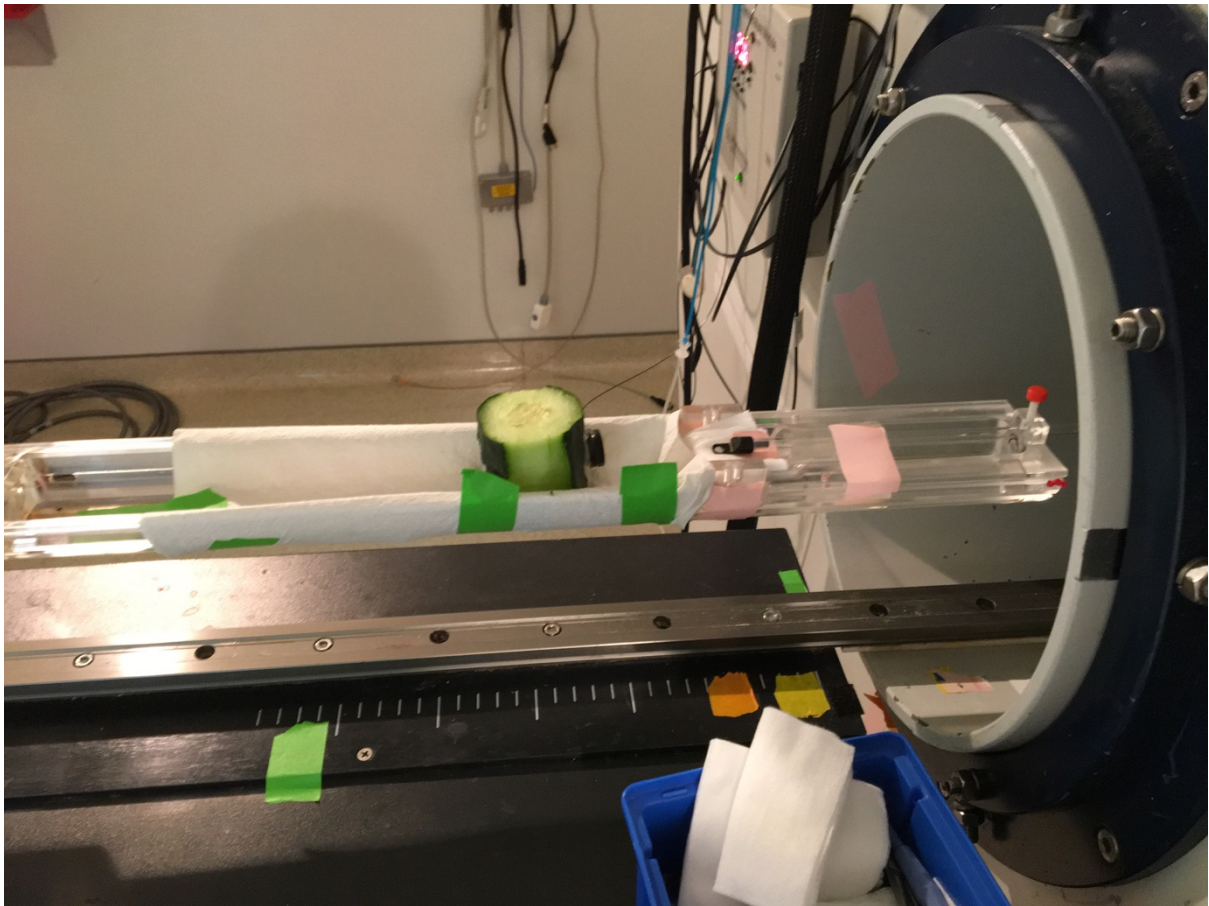

## Supplementary Figure 3.3

$R_1$  map of phantom *in situ* in cucumber

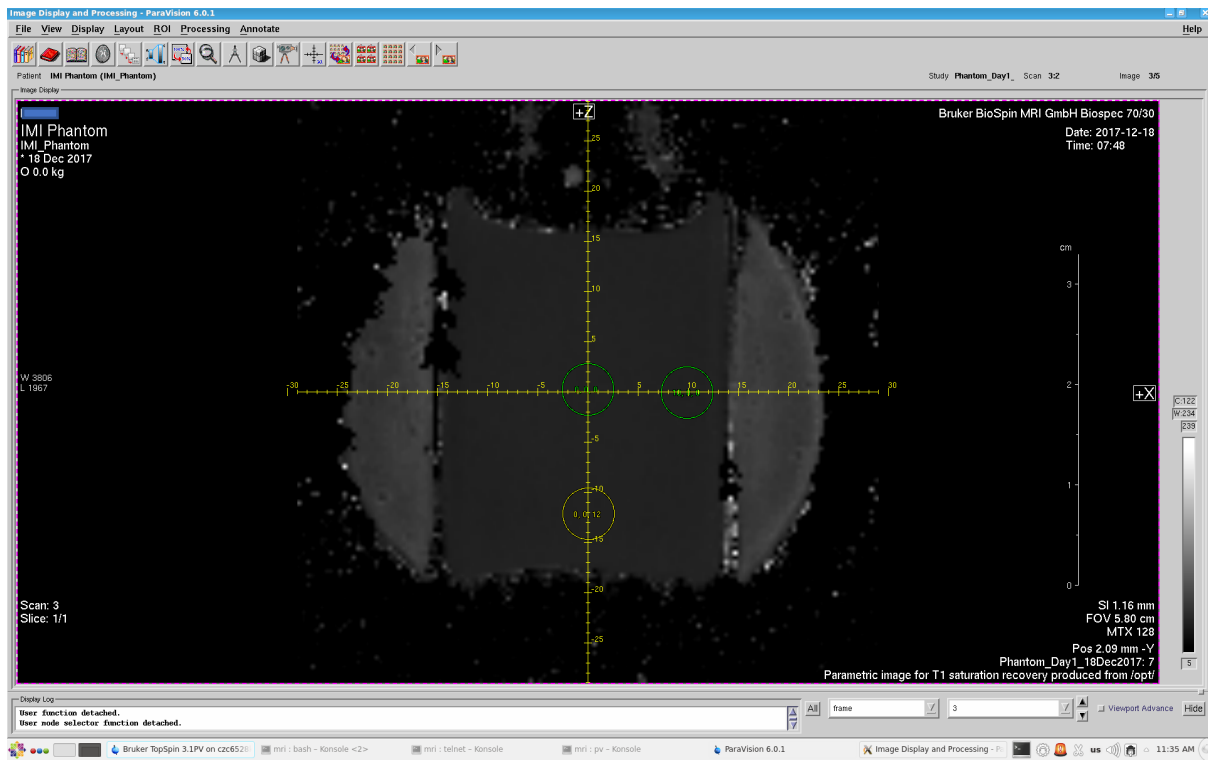



## S4. Error propagation in compartmental models:

Error propagation from pre-contrast  $R_1$  to DCEMRI biomarkers was simulated for four preclinical case-studies, as shown in Table 4. Representative ‘true’ values of kinetic parameters, pre-contrast  $R_1$  values ( $R_{1,0}$ ), and appropriate tracer kinetic models were chosen from literature to estimate contrast agent concentration uptake in each tissue type. A population-based input function, given by Model B in [1], was assumed. A fixed error in  $R_{1,0}$  (calculated as  $2 \times \text{SD} = 0.0624 \text{ s}^{-1}$ ) was propagated to the dynamic MR signal assuming a spoiled gradient acquisition. The signal was then converted to a concentration profile, and tracer kinetic model fitting was used to estimate kinetic parameters. Absolute errors in kinetic parameters are given in Table 4.

Note that the  $R_{1,0}$  error propagation simulated in this paper does not consider the effects of errors or error compensation in other data. In particular we assume that the dynamic  $R_{1,t}$  measurements are error-free.

## References

1. McGrath, D. M.; Bradley, D. P.; Tessier, J. L.; Lacey, T.; Taylor, C. J.; Parker, G. J. M. Comparison of Model-Based Arterial Input Functions for Dynamic Contrast-Enhanced MRI in Tumor Bearing Rats. *Magn. Reson. Med.* **2009**, *61* (5), 1173–1184.
2. Larsson, C.; Kleppstø, M.; Grothe, I.; Vardal, J.; Bjørnerud, A. T1 in High-Grade Glioma and the Influence of Different Measurement Strategies on Parameter Estimations in DCE-MRI. *J. Magn. Reson. Imaging* **2015**, *42* (1), 97–104.
3. Merali, Z.; Huang, K.; Mikulis, D.; Silver, F.; Kassner, A. Evolution of Blood-Brain-Barrier Permeability after Acute Ischemic Stroke. *PLoS One* **2017**, *12* (2), e0171558.
4. Jakob, P. M.; Hillenbrand, C. M.; Wang, T.; Schultz, G.; Hahn, D.; Haase, A. Rapid Quantitative lung 1H T1 Mapping. *J. Magn. Reson. Imaging* **2001**, *14* (6), 795–799.
5. Chow, A. M.; Gao, D. S.; Fan, S. J.; Qiao, Z.; Lee, F. Y.; Yang, J.; Man, K.; Wu, E. X. Measurement of Liver T1 and T2 Relaxation Times in an Experimental Mouse Model of Liver Fibrosis. *J. Magn. Reson. Imaging* **2012**, *36* (1), 152–158.
6. Chwang, W. B.; Jain, R.; Bagher-Ebadian, H.; Nejad-Davarani, S. P.; Iskander, A. S. M.; VanSlooten, A.; Schultz, L.; Arbab, A. S.; Ewing, J. R. Measurement of Rat Brain Tumor Kinetics Using an Intravascular MR Contrast Agent and DCE-MRI Nested Model Selection. *J. Magn. Reson. Imaging* **2014**, *40* (5), 1223–1229.
7. Abo-Ramadan, U.; Durukan, A.; Pitkonen, M.; Marinkovic, I.; Tatlisumak, E.; Pedrono, E.; Soinne, L.; Strbian, D.; Tatlisumak, T. Post-Ischemic Leakiness of the Blood–brain Barrier: A Quantitative and Systematic Assessment by Patlak Plots. *Exp. Neurol.* **2009**, *219* (1), 328–333.
8. Mistry, N. N.; Qi, Y.; Hedlund, L. W.; Johnson, G. A. Ventilation/perfusion Imaging in a Rat Model of Airway Obstruction. *Magn. Reson. Med.* **2010**, *63* (3), 728–735.
9. Ulloa, J. L.; Stahl, S.; Yates, J.; Woodhouse, N.; Kenna, J. G.; Jones, H. B.; Waterton, J. C.; Hockings, P. D. Assessment of Gadoxetate DCE-MRI as a Biomarker of Hepatobiliary Transporter Inhibition. *NMR Biomed.* **2013**, *26* (10), 1258–1270.
10. Hockings, P.; Karageorgis, A.; Lenhard, S.; Yerby, B.; Forsgren, M.; Liachenko, S.; Johansson, E.; Peterson, R.; Yang, X.; Williams, D.; et al. A Multicenter in Vivo Study to Evaluate Gadoxetate DCE-MRI as a Preclinical Biomarker of Liver Function. *ISMRM Annual Meeting* **2017**, Abstract No. 4862.

Supplementary Table 4.1: values used to populate Table 4:

| Case-study                     | Parameters                                    |        | Absolute error                    | Relative error (%)                                   |
|--------------------------------|-----------------------------------------------|--------|-----------------------------------|------------------------------------------------------|
|                                |                                               |        | $ X_{R_{1,0}error} - X_{true} ^a$ | $100 \frac{ X_{R_{1,0}error} - X_{true} }{X_{true}}$ |
| Glioma                         | $R_{1,0}$ (s <sup>-1</sup> ) [2]              | 0.67   | 0.0624                            | 9.3                                                  |
|                                | $v_p$                                         | 0.016  | 0.0016                            | 9.7                                                  |
|                                | $v_e$                                         | 0.236  | 0.0239                            | 10.1                                                 |
|                                | $K_{trans}$ (min <sup>-1</sup> )              | 0.046  | 0.0039                            | 8.5                                                  |
| Transient ischemia             | $R_{1,0}$ (s <sup>-1</sup> ) [3]              | 1.25   | 0.0624                            | 5.0                                                  |
|                                | $v_p$                                         | 0.015  | 0.0008                            | 5.2                                                  |
|                                | $K_i$ (ml.g <sup>-1</sup> . s <sup>-1</sup> ) | 0.0035 | 0.0002                            | 5.3                                                  |
| Normal lung                    | $R_{1,0}$ (s <sup>-1</sup> ) [4]              | 0.77   | 0.0624                            | 8.1                                                  |
|                                | $v_p$                                         | 0.419  | 0.0437                            | 10.4                                                 |
|                                | $F_p$ (min <sup>-1</sup> )                    | 0.385  | 0.0299                            | 7.8                                                  |
| Normal hepatocyte transporters | $R_{1,0}$ (s <sup>-1</sup> ) [5]              | 1.05   | 0.0624                            | 5.9                                                  |
|                                | $v_e$                                         | 0.23   | 0.0163                            | 7.1                                                  |
|                                | $k_1$ (mM.s <sup>-1</sup> )                   | 0.0294 | 0.0013                            | 4.5                                                  |
|                                | $k_2$ (s <sup>-1</sup> )                      | 0.0049 | 0.0001                            | 1.7                                                  |

<sup>a</sup>  $X_{R_{1,0}error}$  and  $X_{true}$  represent the biomarker value with and without an error in  $R_{1,0}$

Supplementary Table 4.2: tracer kinetic model and DCEMRI parameters used in the simulations

| Case-study                             | Model parameters                                                                                                                                                                      | DCEMRI parameters                                                                                                                                                                                                      |
|----------------------------------------|---------------------------------------------------------------------------------------------------------------------------------------------------------------------------------------|------------------------------------------------------------------------------------------------------------------------------------------------------------------------------------------------------------------------|
| Glioma [6]                             | <p>Extended Tofts:</p> $C(t) = v_p c_a(t) + K_{trans} e^{-t \frac{K_{trans}}{v_e}} * c_a(t)$ <p><math>v_p = 0.67</math>; <math>v_e = 0.016</math>; <math>K_{trans} = 0.046</math></p> | <p>TR = 5.65 ms<br/> <math>\alpha = 30^\circ</math><br/> temporal resolution = 11.57 s<br/> DCEMRI scan time = 15 min<br/> <math>r_1</math> (gadopentetate) = <math>3.9 \text{ s}^{-1} \cdot \text{mM}^{-1}</math></p> |
| Transient Ischemia [7]                 | <p>Patlak:</p> $C(t) = v_p c_a(t) + K_i \int_0^t c_a(t) dt$ <p><math>v_p = 0.015</math>; <math>K_i = 0.0035</math></p>                                                                | <p>TR = 5.65 ms<br/> <math>\alpha = 30^\circ</math><br/> temporal resolution = 60 s<br/> DCEMRI scan time = 30 min<br/> <math>r_1</math> (gadopentetate) = <math>3.8 \text{ s}^{-1} \cdot \text{mM}^{-1}</math></p>    |
| Normal lung [8]                        | <p>Model-free deconvolution:</p> $C(t) = c_a(t) * h(t)$ $v_p = \int_0^t h(t) dt; \quad F_p = \max(h(t))$ <p><math>v_p = 0.419</math>; <math>F_p = 0.385</math></p>                    | <p>TR = 4 ms<br/> <math>\alpha = 40^\circ</math><br/> temporal resolution = 0.4 s<br/> DCEMRI scan time = 45 min<br/> <math>r_1</math> (gadopentetate) = <math>3.8 \text{ s}^{-1} \cdot \text{mM}^{-1}</math></p>      |
| Normal hepatocyte transporters [9][10] | <p>2-compartment uptake and efflux:</p> $C(t) = v_e c_a(t) + k_1(1 - v_e) e^{-tk_2} * c_a(t)$ <p><math>v_e = 0.23</math>; <math>k_1 = 0.0294</math>; <math>k_2 = 0.0049</math></p>    | <p>TR = 7.1 ms<br/> <math>\alpha = 30^\circ</math><br/> temporal resolution = 60 s<br/> DCEMRI scan time = 60 min<br/> <math>r_1</math> (gadodotate) = <math>5.9 \text{ s}^{-1} \cdot \text{mM}^{-1}</math></p>        |

## S5. Comparisons of $R_1$ fits in “R” and ParaVision

Comparison between 2-parameter  $R_1$  analysis performed locally in ParaVision ( $R_1^{PV}$ ) and  $R_1$  analyses performed centrally in “R” ( $R_1^R$ ). Each panel shows a plot of  $\log_{10} R_1^{PV} - \log_{10} R_1^R$  against  $(\log_{10} R_1^{PV} + \log_{10} R_1^R)/2$ . Error bars are derived from the Standard Error in  $R_1$  from the  $nls()$  fit in “R”.

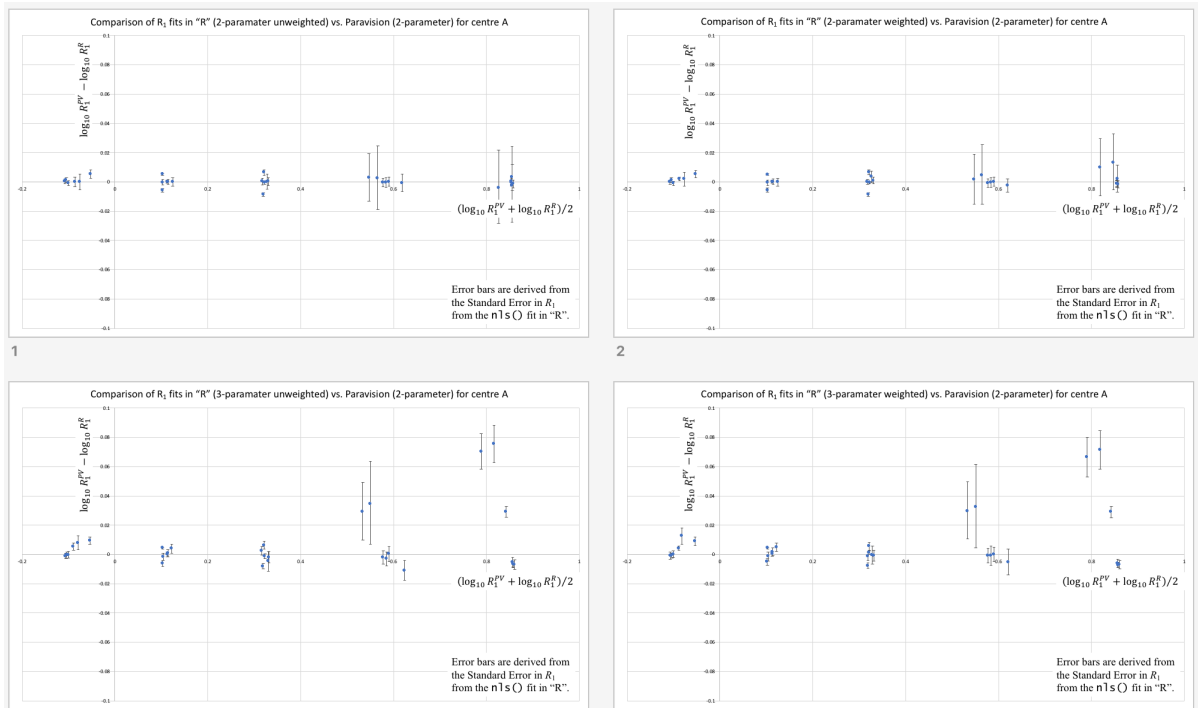

Supplement: mmc1.pdf [file mmc1.pdf]
